# Supplementary material for: Study of the thermal properties of wurtzite AlN crystals based on different facets
Source: Royal Society of Chemistry journal article supplement (doi:10.1039/d5ce00490j), 2025-12-11

Supporting information

## **Study of the thermal properties of wurtzite AlN crystal based on different facets**

**Jiachen Du,<sup>a</sup> Shouzhi Wang,<sup>\*ab</sup> Guodong Wang,<sup>\*a</sup> Wenhao Cao,<sup>a</sup> Yajun Zhu,<sup>a</sup> Yuzhu Wu,<sup>a</sup> Lingshuang Lv,<sup>a</sup> Heng Wang,<sup>a</sup> Chengmin Chen,<sup>c</sup> Liujiang Zhou,<sup>d</sup> Xiangang Xu<sup>a</sup> and Lei Zhang<sup>\*ab</sup>**

<sup>a</sup>. Institute of Novel Semiconductors, State Key laboratory of Crystal Material, Shandong University, Jinan 250100, P. R. China. \*E-mail: wangsz@sdu.edu.cn, guodong9631@sdu.edu.cn, leizhang528@sdu.edu.cn

<sup>b</sup>. Shenzhen Research Institute, Shandong University, Shenzhen 518000, P. R. China.

<sup>c</sup>. Energy Research Institute of Shandong Academy of Sciences, Jinan 250100, P. R. China.

<sup>d</sup>. School of Physics, State Key Laboratory of Electronic Thin Films and Integrated Devices, University of Electronic Science and Technology of China, Chengdu 611731, P. R. China.

Figure S1. 3D AFM image of the surface morphology of (a) Ps, (b) Pr and (c) SP.

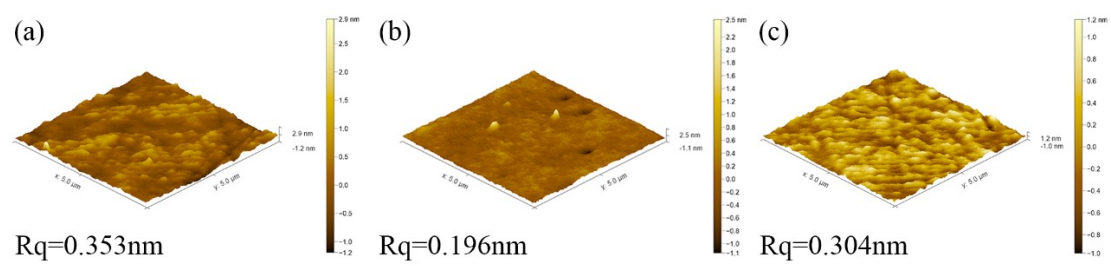

Supplement: d5ce00490j1.pdf [file d5ce00490j1.pdf]
